# Supplementary material
Source: publisher site journal article supplement (https://www.dovepress.com/article/450825)
Supplement: Supplementary file 1 [file get_supplementary_file.php]

**Figure S1** Diagram outlining the patient recruitment process and study methodology.


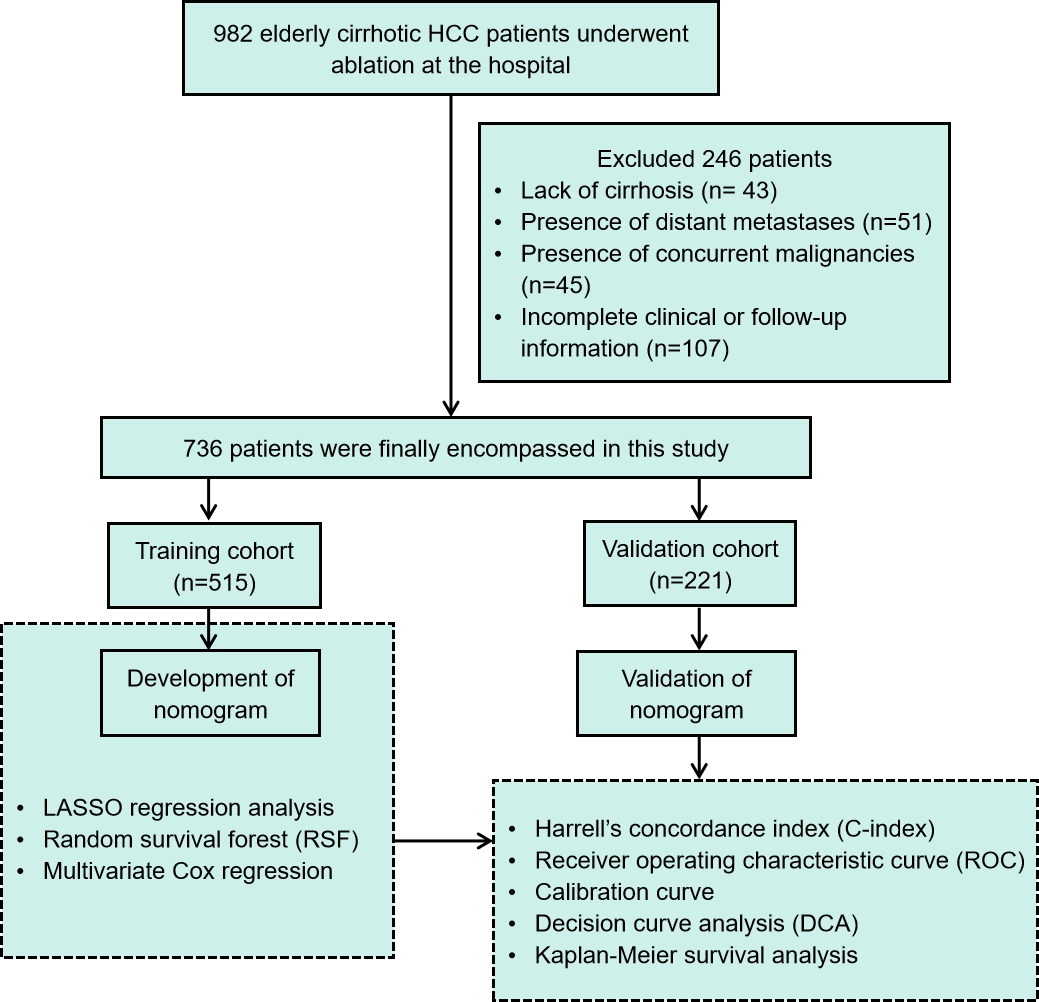


**Figure S2** ROC curve analysis of the nomogram for 3-, 5-, and 8-year OS prediction in the validation cohort.


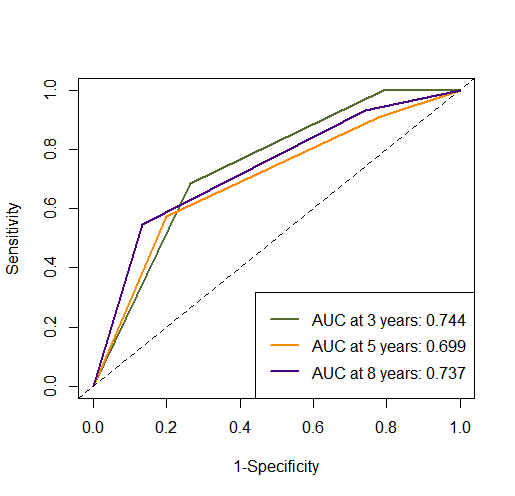


**Abbreviations:** ROC, receiver operating characteristic; OS, overall survival; AUC, area under the curve.

**Figure S3** Calibration plots of the nomogram for 3-year (A), 5-year (B), and 8-year (C) OS prediction in the validation cohort.


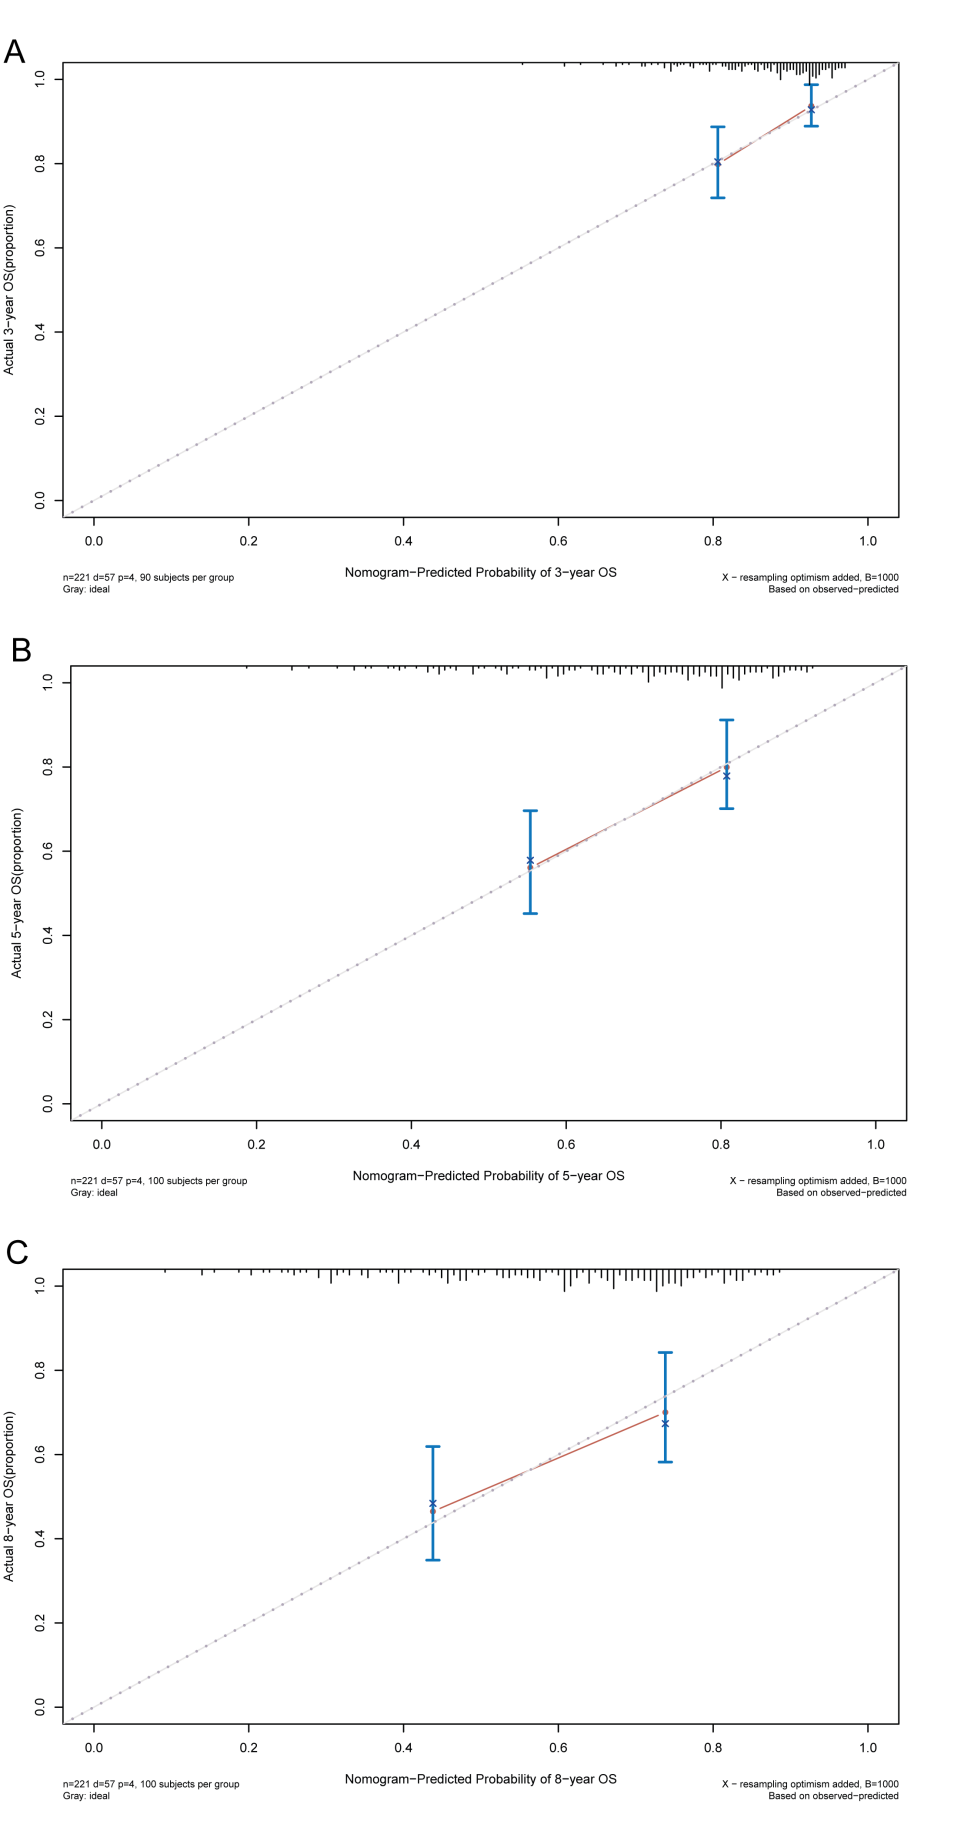


**Abbreviations:** OS, overall survival.

**Figure S4** DCA curve analysis of the nomogram for 3-year (A), 5-year (B), and 8-year (C) OS prediction in the validation cohort.


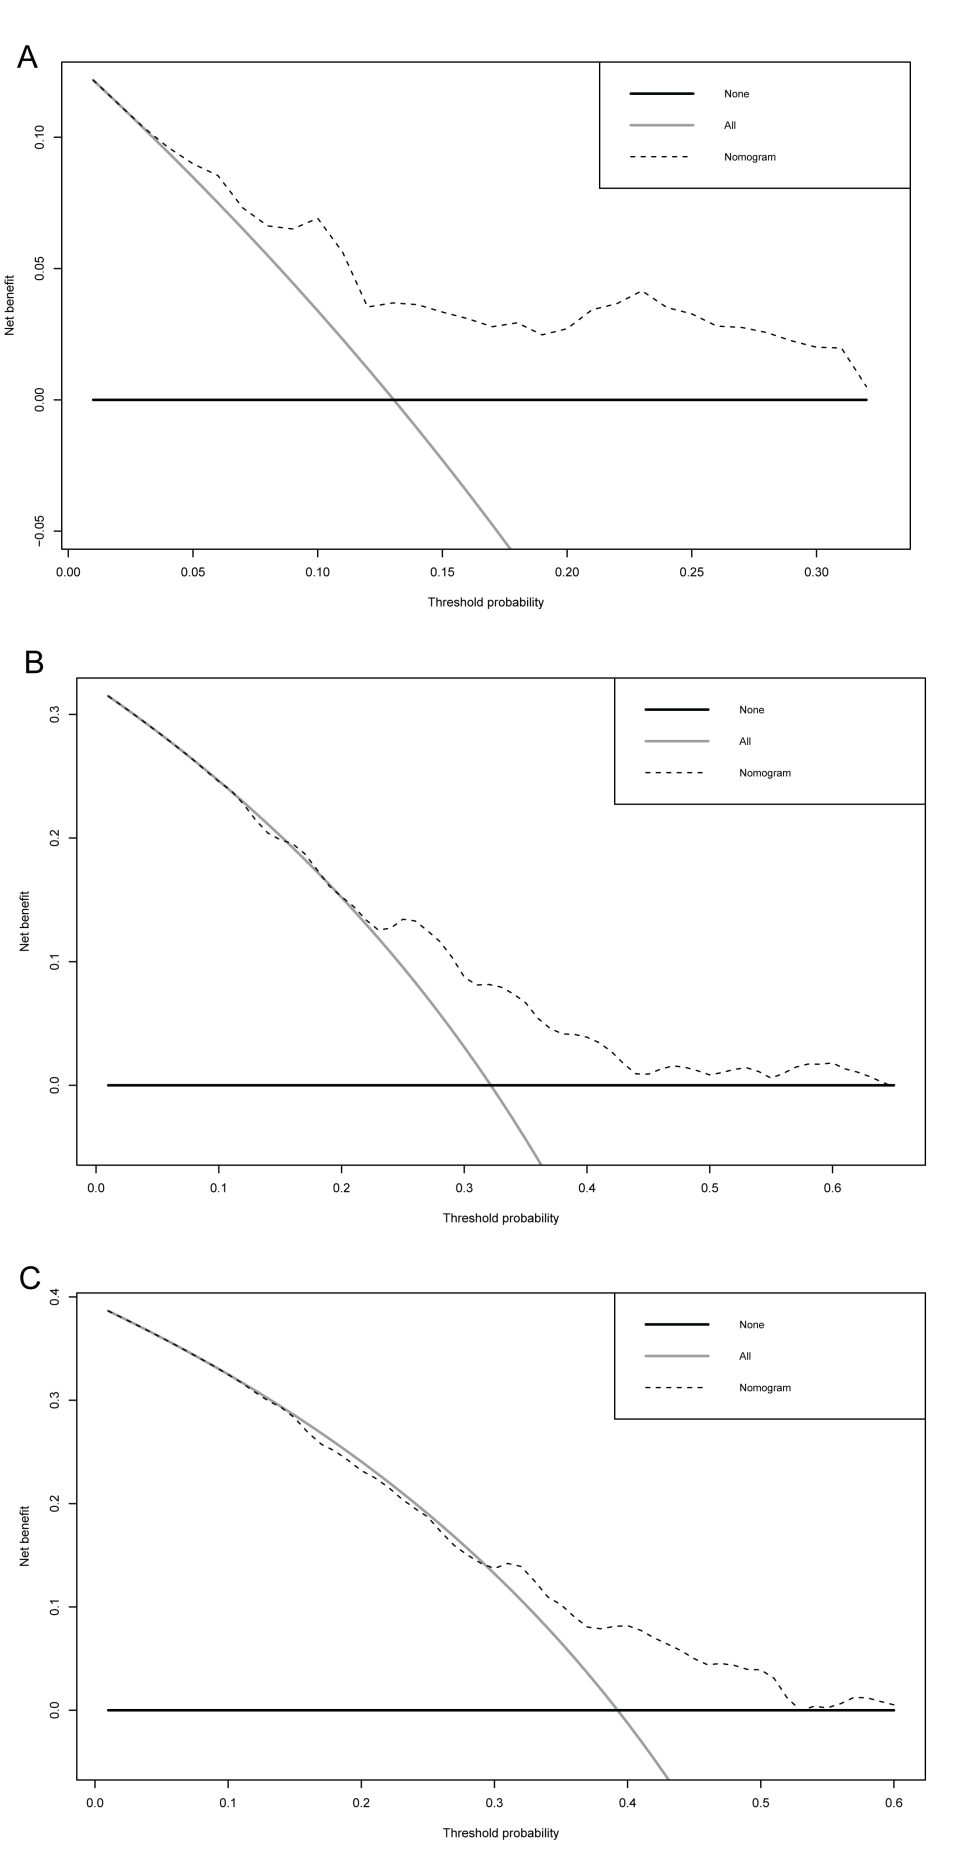


**Abbreviations:** DCA, decision curve analysis; OS, overall survival.

**Figure S5** Kaplan-Meier OS curves for nomogram-derived low, intermediate, and high-risk groups in the validation cohort.


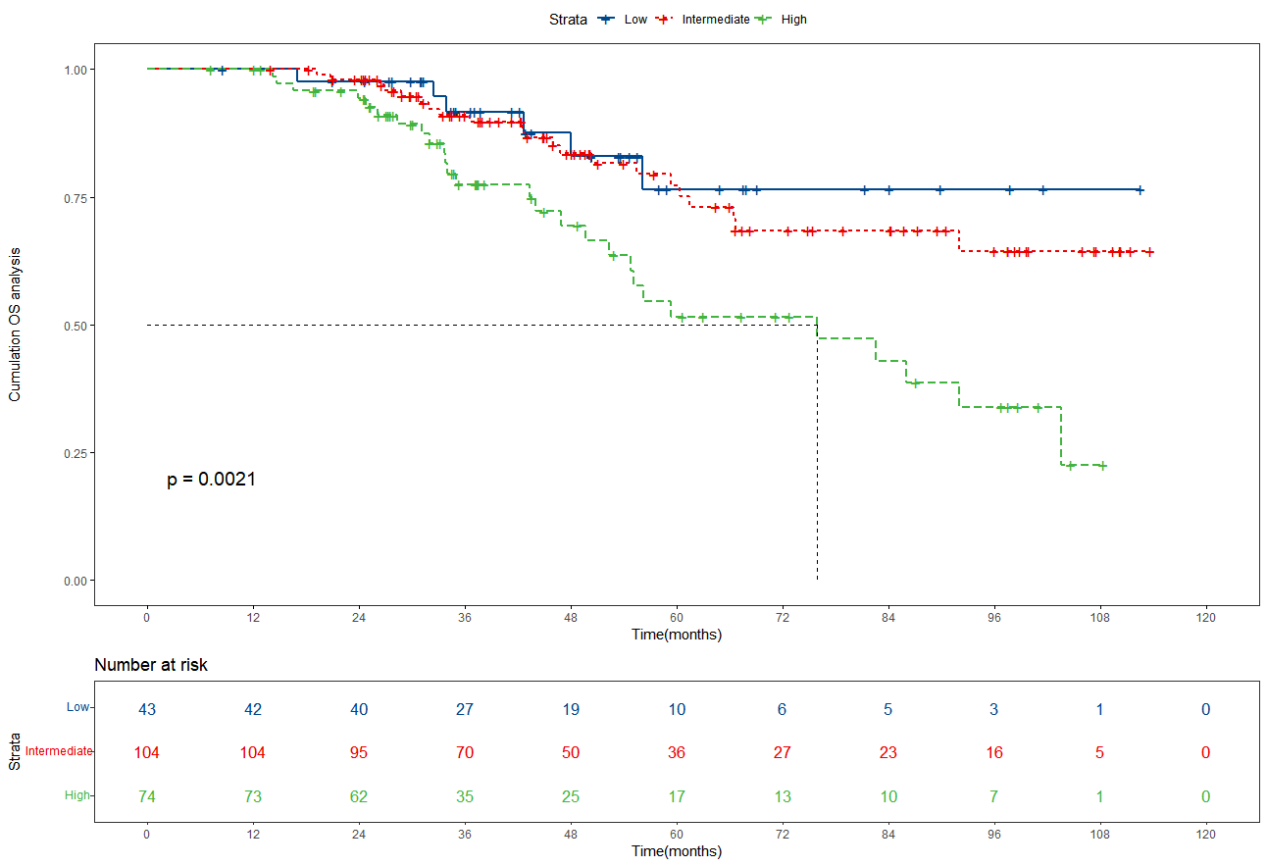


**Abbreviations:** OS, overall survival.
